# Supplementary material for: An Exercise Prescription for Patients with Stroke and Sarcopenia Based on the Modified Delphi Study
Source: MDPI journal article supplement (doi:10.3390/life14030332), 2024-03-01
Supplement: s1 [file s1]

Table S1. The details of all panelists in the Delphi study.

| ID | Age | Sex* | Profession                                             | Professional experience                                                                                                                                                                                                                                                                                                                                                                                                                                                                                         | Experience period (yrs) | Affiliation         | Hospital infomation**                                    |
|----|-----|------|--------------------------------------------------------|-----------------------------------------------------------------------------------------------------------------------------------------------------------------------------------------------------------------------------------------------------------------------------------------------------------------------------------------------------------------------------------------------------------------------------------------------------------------------------------------------------------------|-------------------------|---------------------|----------------------------------------------------------|
| 1  | 46  | M    | Medical doctor and Professor (Rehabilitation medicine) | <ul style="list-style-type: none"> <li>✓ M.D.</li> <li>✓ Medical specialist in Rehabilitatoin Medicine</li> <li>✓ Professor and Former Director of Medical Affairs of National Traffic Injury Rehabilitation Hosipital-Seoul National University</li> <li>✓ Academic Director, Korean Society of Rehabilitation Robot</li> <li>✓ Member of Academic Committee of Korean Society for NeuroRehabilitation</li> <li>✓ Member of Policy Committee of Korean Academy of Geriatric Rehabilitation Medicine</li> </ul> | 21                      | University hospital | General hopsital / 10 departments / About 250 patients   |
| 2  | 43  | F    | Medical doctor and Professor (Rehabilitation medicine) | <ul style="list-style-type: none"> <li>✓ M.D.</li> <li>✓ Medical specialist in Rehabilitatoin Medicine</li> <li>✓ Member of Clinical Practice Guidelines Committee of Korean Academy of Rehabilitation Medicine</li> <li>✓ Member of Education Committee of Korean Society for NeuroRehabilitation</li> </ul>                                                                                                                                                                                                   | 15                      | University hospital | General hopsital / 10 departments / About 250 patients   |
| 3  | 42  | F    | Medical doctor and Professor (Rehabilitation medicine) | <ul style="list-style-type: none"> <li>✓ M.D.</li> <li>✓ Medical specialist in Rehabilitatoin Medicine</li> <li>✓ Member of Research Planning Committee of Korean Academy of Rehabilitation Medicine</li> </ul>                                                                                                                                                                                                                                                                                                 | 14                      | University hospital | General hopsital / 45 departments / About 1,400 patients |
| 4  | 50  | M    | Medical doctor and Professor (Neurosurgery)            | <ul style="list-style-type: none"> <li>✓ M.D., Ph.D.</li> <li>✓ Medical specialist in Neurosurgery</li> <li>✓ Chief board member in General secretary of the Korean Society of Stereotactic and Functional Neurosurgery</li> <li>✓ Editor of Journal of Korean Neurosurgical Society</li> </ul>                                                                                                                                                                                                                 | 26                      | University hospital | General hopsital / 38 departments / About 800 patients   |
| 5  | 48  | M    | Medical doctor and Professor (Neurology)               | <ul style="list-style-type: none"> <li>✓ M.D., Ph.D.</li> <li>✓ Medical specialist in Neurology</li> <li>✓ Member of the Korean Epilepsy Society</li> <li>✓ Member of the Korean Neurological Association.</li> <li>✓ Best Poster Awards in 17th World Congress on Controversies in Neurology in 2023</li> </ul>                                                                                                                                                                                                | 25                      | University hospital | General hopsital / 38 departments / About 800 patients   |
| 6  | 36  | M    | Physical therapist                                     | <ul style="list-style-type: none"> <li>✓ Registered therapist</li> <li>✓ Team leader</li> <li>✓ Organization manager of Korean Physical Therapy Association</li> </ul>                                                                                                                                                                                                                                                                                                                                          | 14                      | University hospital | General hopsital / 38 departments / About 800 patients   |

| ID | Age | Sex* | Profession             | Professional experience                                                                                                                                                                                                                                             | Experience period (yrs) | Affiliation             | Hospital information**                                                 |
|----|-----|------|------------------------|---------------------------------------------------------------------------------------------------------------------------------------------------------------------------------------------------------------------------------------------------------------------|-------------------------|-------------------------|------------------------------------------------------------------------|
| 7  | 36  | M    | Physical therapist     | <ul style="list-style-type: none"> <li>✓ Registered therapist</li> <li>✓ Team leader</li> <li>✓ Practice therapist instructor of the training course of central nervous system developmental rehabilitation by Korean Academy of Rehabilitation Medicine</li> </ul> | 11                      | University hospital     | General hospital / 38 departments / About 800 patients                 |
| 8  | 33  | M    | Physical therapist     | <ul style="list-style-type: none"> <li>✓ Registered therapist</li> <li>✓ Team leader</li> </ul>                                                                                                                                                                     | 8                       | Rehabilitation hospital | Rehabilitation specialty hospital / 2 departments / About 250 patients |
| 9  | 35  | F    | Occupational therapist | <ul style="list-style-type: none"> <li>✓ Registered therapist</li> <li>✓ Team leader</li> </ul>                                                                                                                                                                     | 14                      | Rehabilitation hospital | Rehabilitation specialty hospital / 2 departments / About 250 patients |
| 10 | 35  | M    | Occupational therapist | <ul style="list-style-type: none"> <li>✓ Registered therapist</li> <li>✓ Senior therapist</li> </ul>                                                                                                                                                                | 11                      | University hospital     | General hospital / 38 departments / About 800 patients                 |
| 11 | 50  | F    | Nurse                  | <ul style="list-style-type: none"> <li>✓ Registered nurse</li> <li>✓ Head nurse</li> </ul>                                                                                                                                                                          | 23                      | Rehabilitation hospital | Rehabilitation specialty hospital / 2 departments / About 250 patients |
| 12 | 47  | Fe   | Nurse                  | <ul style="list-style-type: none"> <li>✓ Registered nurse</li> <li>✓ Head nurse</li> </ul>                                                                                                                                                                          | 25                      | Rehabilitation hospital | Rehabilitation specialty hospital / 2 departments / About 250 patients |
| 13 | 59  | F    | Nurse                  | <ul style="list-style-type: none"> <li>✓ Registered nurse</li> <li>✓ Head nurse</li> </ul>                                                                                                                                                                          | 15                      | Rehabilitation hospital | Rehabilitation specialty hospital / 2 departments / About 250 patients |
| 14 | 32  | F    | Nurse                  | <ul style="list-style-type: none"> <li>✓ Registered nurse</li> <li>✓ Team leader</li> </ul>                                                                                                                                                                         | 11                      | University hospital     | General hospital / 38 departments / About 800 patients                 |
| 15 | 28  | F    | Nurse                  | <ul style="list-style-type: none"> <li>✓ Registered nurse</li> <li>✓ Researcher in the rehabilitation field</li> </ul>                                                                                                                                              | 5                       | University hospital     | General hospital / 38 departments / About 800 patients                 |

\* M means male and F means female in section of Sex. \*\* Hospital information includes type of hospital, number of specialized medical departments, and number of hospitalized patients
